# Supplementary material
Source: PubMed Central journal article supplement (PMC6474247)
Supplement: NIHMS1007255-supplement-Supplemental.pdf [file NIHMS1007255-supplement-Supplemental.pdf]

**Online Supplement: Major opportunities and considerations for core outcome set (COS) development for ophthalmology**

| <b>Types of Opportunities/Considerations</b>      | <b>Opportunities/Considerations</b>                                                                                                                                                                                                                                                                                                                                                                                                                                                                                                                                          |
|---------------------------------------------------|------------------------------------------------------------------------------------------------------------------------------------------------------------------------------------------------------------------------------------------------------------------------------------------------------------------------------------------------------------------------------------------------------------------------------------------------------------------------------------------------------------------------------------------------------------------------------|
| Major opportunities that COS development presents | <ul style="list-style-type: none"> <li>• Engagement of all stakeholders (patients, ophthalmologists, optometrists, researchers, funders, regulators, industry partners, journal editors, guideline developers) to participate in COS development</li> <li>• Opportunities for collaboration, exchange of ideas, and co-learning</li> <li>• Streamline the design of pivotal RCTs to bring new products to market</li> <li>• Opportunities for funders to participate in COS development, thereby influencing what outcomes are measured in the research they fund</li> </ul> |
| Methodologic considerations                       | <ul style="list-style-type: none"> <li>• Consider the five elements of each outcome: domain, specific measurement, specific metric, method of aggregation, and time-points</li> <li>• Consider what each outcome intends to measure: improvement in health, disease progression, or avoidance of disease progression</li> </ul>                                                                                                                                                                                                                                              |
| Practical considerations                          | <ul style="list-style-type: none"> <li>• Disease severity and disease subtypes</li> <li>• Preferred measurement instruments and technologies could change over time</li> <li>• Feasibility of measuring each outcome in busy clinics</li> <li>• COSs should include patient-important outcomes</li> </ul>                                                                                                                                                                                                                                                                    |
| Disease-specific considerations<br>AMD            | <ul style="list-style-type: none"> <li>• Urgent need for COS for geographic AMD</li> </ul>                                                                                                                                                                                                                                                                                                                                                                                                                                                                                   |
| Refractive error in children                      | <ul style="list-style-type: none"> <li>• Quality differs among PRO instruments for refractive error, specifically in terms of rigor of design and analysis.</li> <li>• Age of the patient can add challenges to assessing outcomes.</li> </ul>                                                                                                                                                                                                                                                                                                                               |
| Dry eye                                           | <ul style="list-style-type: none"> <li>• Only a limited correlation between symptoms and clinical signs</li> <li>• COS developers will need to consider whether separate COSs are needed for each underlying disease or for groups of diseases</li> </ul>                                                                                                                                                                                                                                                                                                                    |
